# Supplementary material
Source: PubMed Central journal article supplement (PMC8172426)
Supplement: NIHMS1674248-supplement-1.pdf [file NIHMS1674248-supplement-1.pdf]

# Figure S1

**A**

## Linear transformation of gene scores

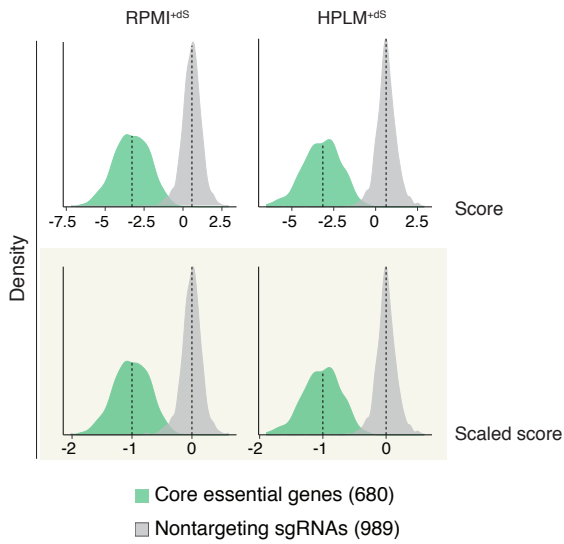

**B**

## Core essential gene prediction

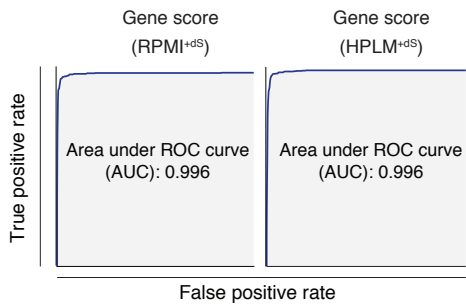

**C**

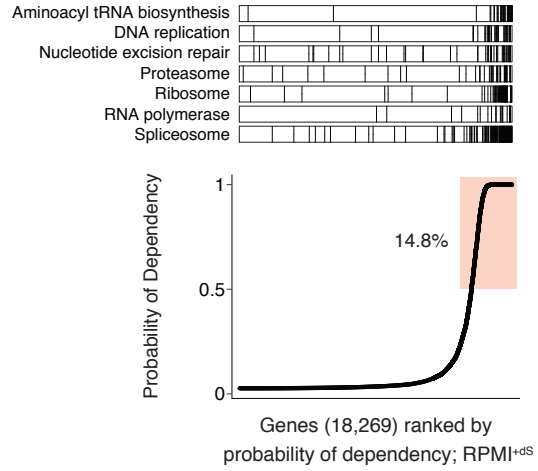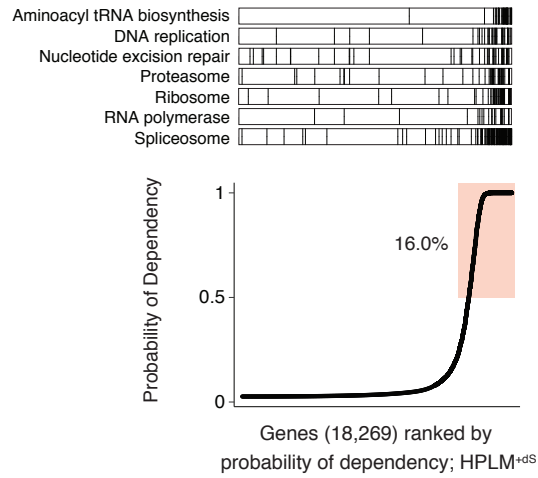

**Figure S1. Gene score scaling and genome-wide screen performance, Related to Figure 1**

(A) Raw (top) and scaled (bottom) score distributions for 680 CEGs (gene score) and 989 non-targeting sgRNAs (depletion score) from genome-wide K562 screens.

(B) Receiver operator characteristic (ROC) curves for the prediction of CEGs using datasets from genome-wide K562 screens.

(C) Plots of targeted genes ranked by probability of dependency from genome-wide K562 screens in RPMI<sup>+dS</sup> (top) and HPLM<sup>+dS</sup> (bottom). Shaded region indicates probability > 0.5. Barcode plots depict the distribution of genes involved in several fundamental cellular processes.

# Figure S2

## A Focused sgRNA library gene targets (651)

Differential dependency (Z score): ■ < -2 ■ > 2 ■ other  
(HPLM - RPMI)

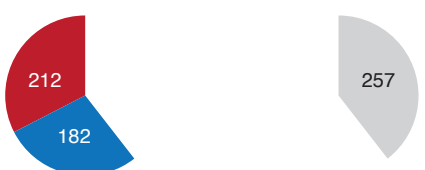

Conditionally essential candidates    Related (family, pathway, interaction)

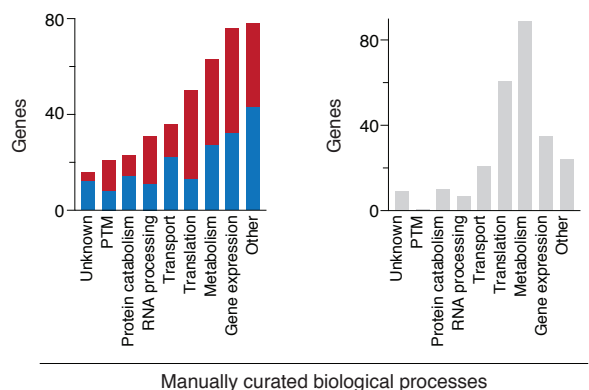

## B Genome-wide screens (K562)

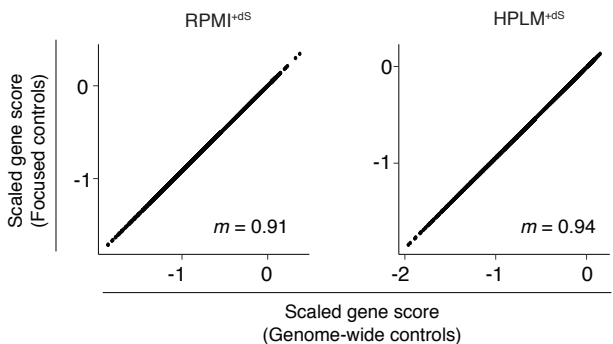

## C Replicate secondary screens (K562)

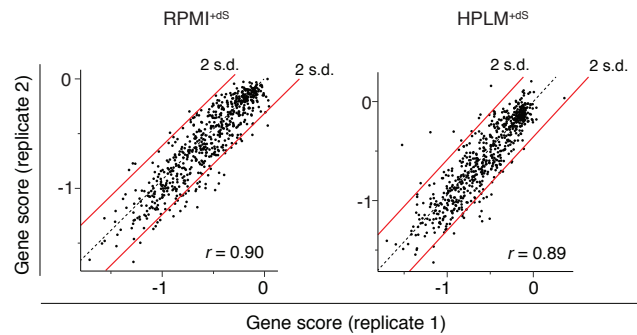

## D Correlation with K562 genome-wide screens (r)

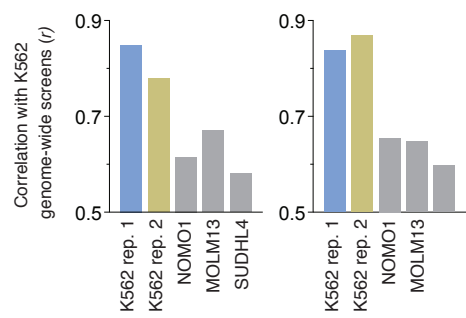

## E Correlation with K562 genome-wide screens (r)

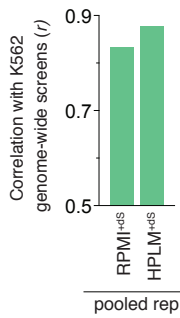

## G Differential dependency (Z score)

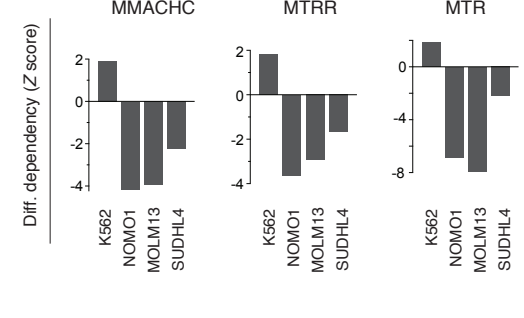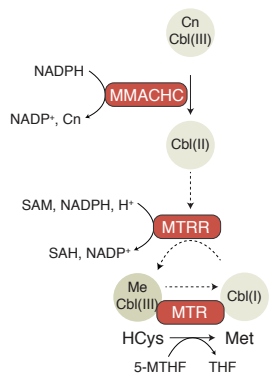

## F Heatmap of differential dependency (Z score)

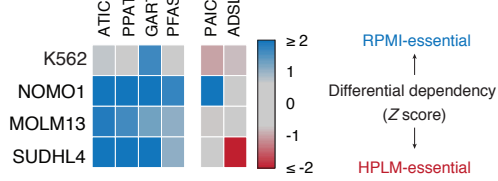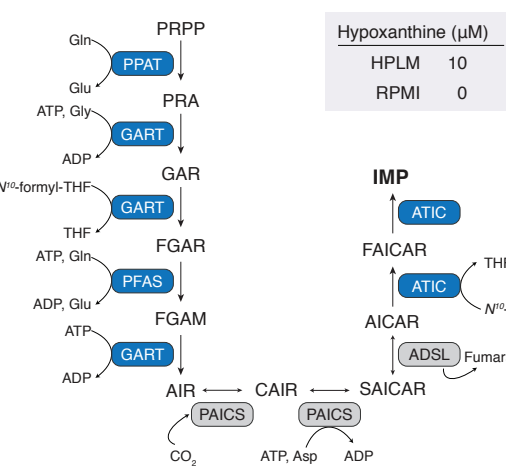

## H Heatmap of differential dependency (Z score)

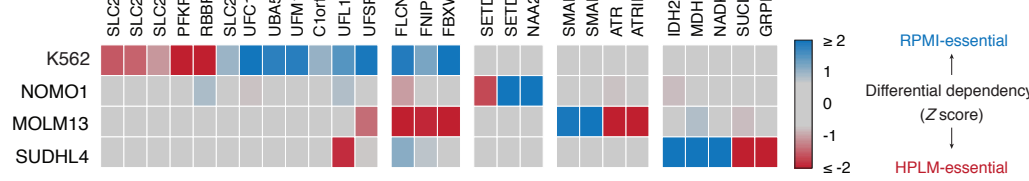

| Gene   | Manually curated process | Gene     | Manually curated process |
|--------|--------------------------|----------|--------------------------|
| RBBP5  | Gene expression          | NAA25    | PTM                      |
| SETD1A |                          |          |                          |
| SETD1B |                          |          |                          |
| SMAD2  |                          |          |                          |
| SMAD4  |                          |          |                          |
| IDH2   | Metabolism               | GRPEL1   | Transport                |
| MDH1   |                          |          |                          |
| NADK2  |                          |          |                          |
| PFKP   | Protein Catabolism       | SLC25A46 | Other                    |
| SUCLG2 |                          |          |                          |
| FBXW11 |                          | ATR      |                          |
|        |                          | ATRIP    |                          |
|        |                          | FLCN     |                          |
|        |                          | FNIP1    |                          |

**Figure S2. Focused sgRNA library design and correlation analyses; additional examples of genes with cell-specific conditional CRISPR phenotypes, Related to Figure 2**

(A) Fraction of genes targeted by the focused sgRNA library with indicated conditional phenotypes from genome-wide K562 screens (top). Composition of focused sgRNA library gene targets by manually curated cellular processes (bottom).

(B) Comparison of gene scores from genome-wide K562 screens scaled by using CEG and non-targeting sgRNA control sets from either the genome-wide or focused sgRNA library.  $m$ , slope.

(C) Comparison of gene scores from replicate secondary K562 screens.  $r$ , Pearson's correlation coefficient.

(D) Gene score correlations between secondary screens in four cell lines and genome-wide K562 screens.

(E) Gene score correlations between pooled secondary K562 screen datasets and genome-wide K562 screens.

(F) Heatmap of conditional phenotypes for the indicated genes (top). Schematic for the de novo purine biosynthesis pathway (bottom). Enzymes encoded by the four genes that share a common RPMI-essential phenotype in three cell lines are shaded blue and catalyze irreversible pathway steps based on annotations in the KEGG Pathway database (Kanehisa et al., 2017). Data for secondary K562 screens are from pooled replicates in panels F-H.

(G) Conditional phenotypes for *MMACHC* (left), *MTRR* (middle), and *MTR* (right). Schematic for the processing of CnCbI (III) to Cbl (II) and downstream conversion of HCys to Met coupled with the reductive generation of Cbl(I) to MeCbI (III) (furthest right). Cbl(I), cob(I)alamin; Cbl(II), cob(II)alamin; CnCbI(III), cyanocob(III)alamin; MeCbI(III), methylcob(III)alamin; 5-MTHF, 5-methyltetrahydrofolate; THF, tetrahydrofolate.

(H) Heatmap of conditional phenotypes for the indicated genes (top). Manually curated processes for each gene (bottom).

# Figure S3

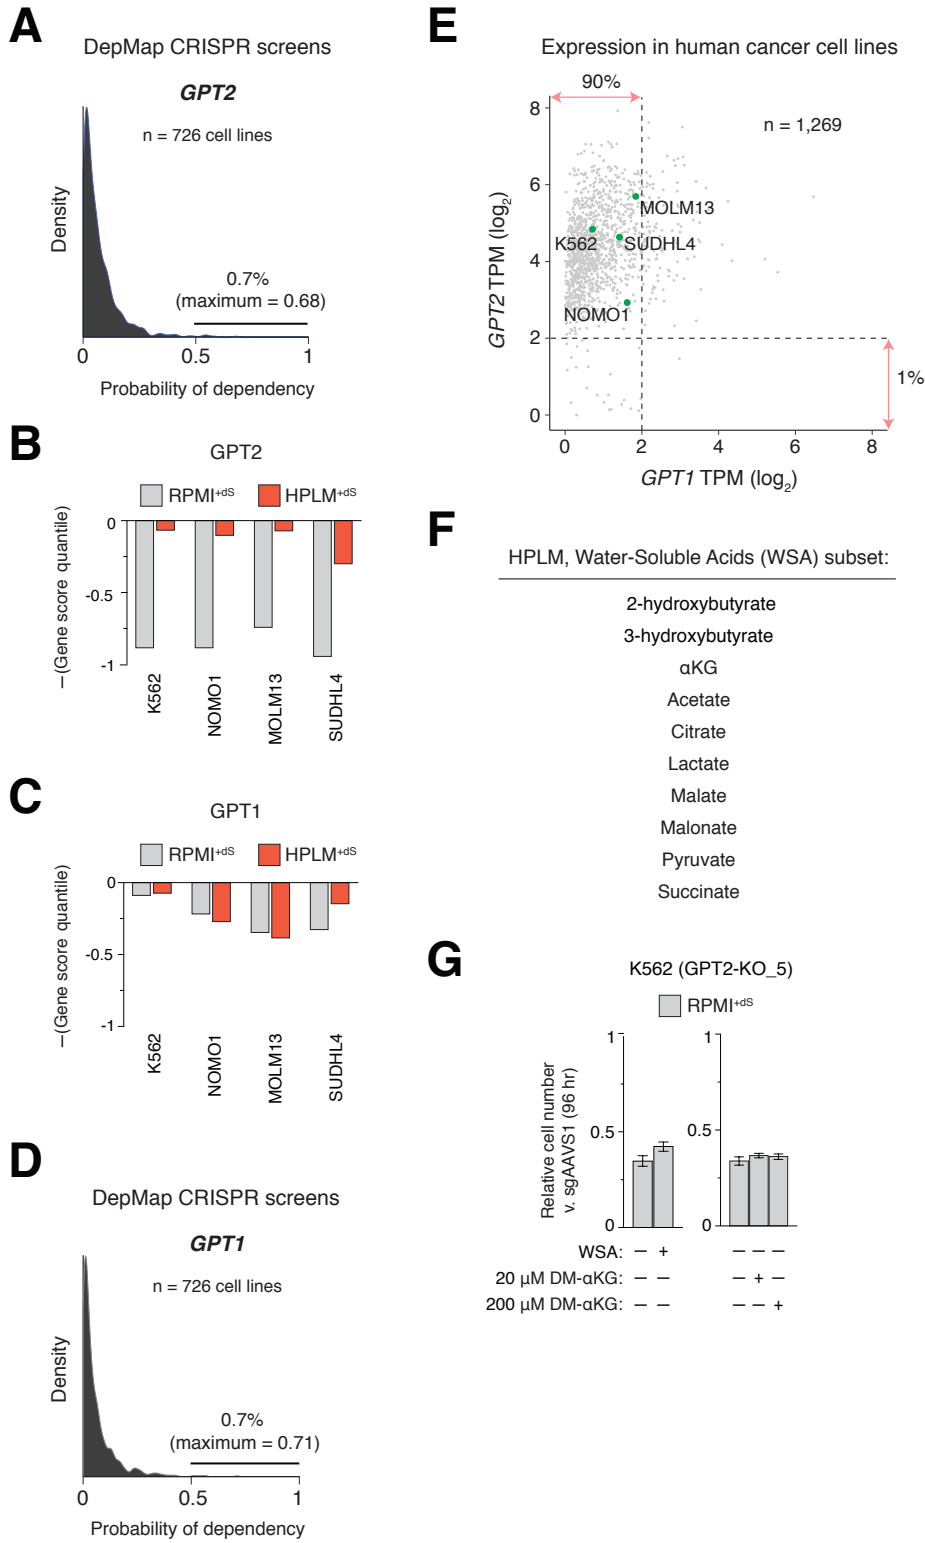

**Figure S3. Additional data related to identification of a gene-nutrient interaction between *GPT2* and alanine, Related to Figure 3**

(A) Density plot for probability of dependency values annotated for *GPT2* across CRISPR screens from DepMap. Probability > 0.5 is the reference threshold for essentiality.

(B-C) Gene score quantiles for *GPT2* (B) and *GPT1* (C) from secondary screens. Data for secondary K562 screens are from pooled replicates.

(D) Density plot for probability of dependency values annotated for *GPT1* across CRISPR screens from DepMap. Probability > 0.5 is the reference threshold for essentiality.

(E) Comparison between *GPT1* and *GPT2* RNA levels in human cancer lines from RNA-seq data in DepMap. Labeled points indicate cell lines in this study. TPM, transcripts per million.

(F) Metabolites that comprise the water-soluble acids (WSAs) subset of HPLM components.

(G) Relative growth of *GPT2*-knockout versus control cells (mean  $\pm$  SD,  $n = 3$ ). DM, dimethyl.

# Figure S4

## A

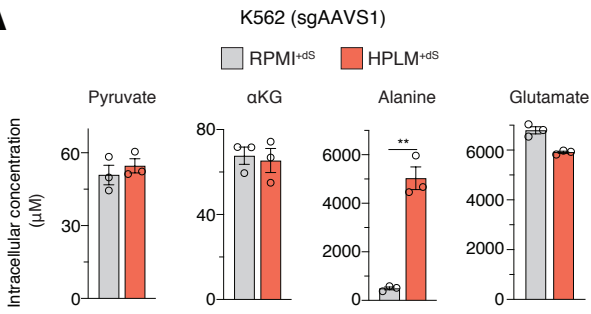

## B

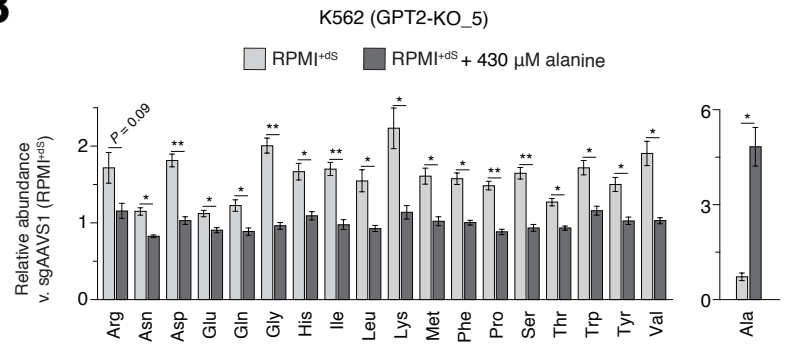

## C

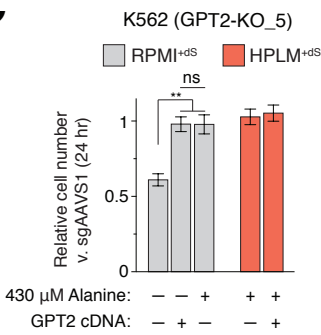

## D

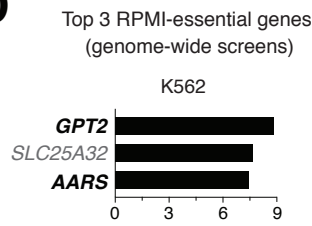

## E

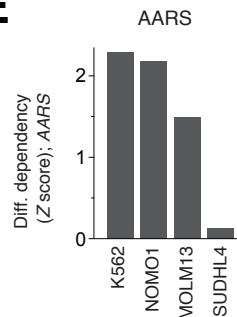

## F

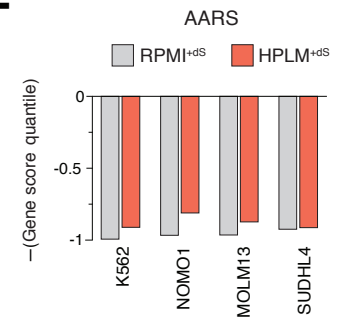

## G

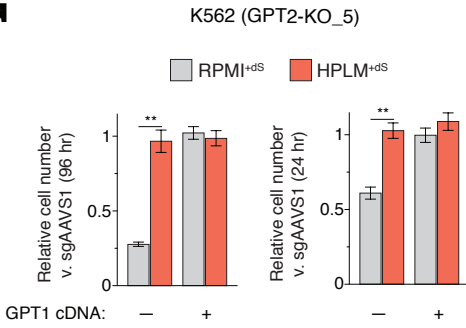

## I

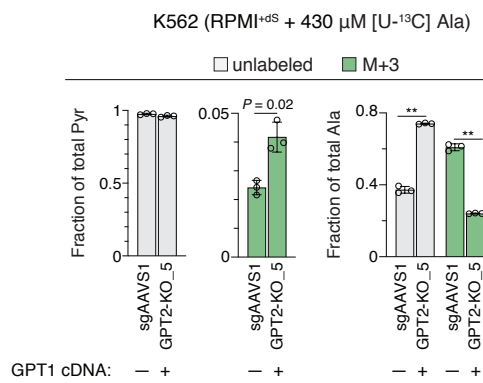

## K

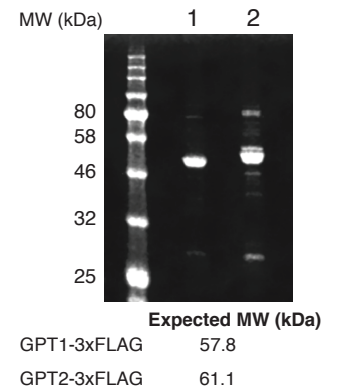

## H

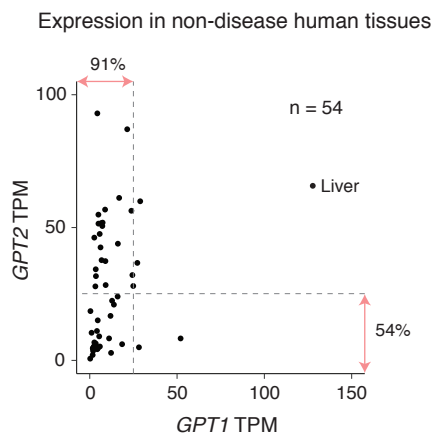

## J

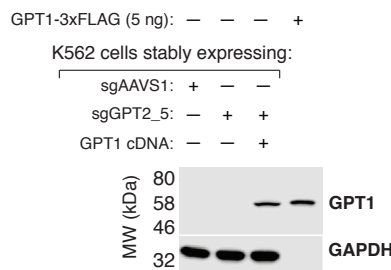

## L

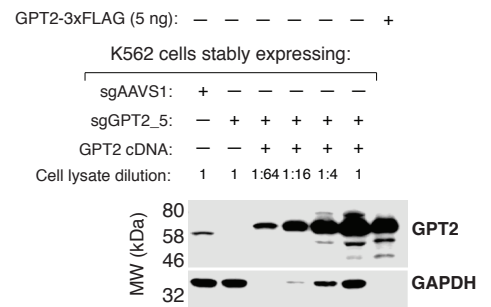

**Figure S4. Additional data related to protein synthesis underlies the *GPT2*-alanine interaction and human GPTs show markedly different  $K_M$  values for pyruvate, Related to Figure 4**

(A) Concentrations of GPT reaction components in control (sgAAVS1) K562 cells following 24 hr culture (mean  $\pm$  SEM,  $n = 3$ ,  $**P < 0.01$ ).

(B) Relative amino acid levels in *GPT2*-knockout cells following culture in either RPMI<sup>+dS</sup> (light gray) or RPMI<sup>+dS</sup> containing 430  $\mu$ M alanine (dark gray) versus control cells in RPMI<sup>+dS</sup> (mean  $\pm$  SEM,  $n = 3$ ,  $*P < 0.05$ ,  $**P < 0.005$ ).

(C) Relative growth of *GPT2*-knockout versus control cells (mean  $\pm$  SD,  $n = 3$ ,  $**P < 0.005$ ). ns, not significant.

(D) Top three scoring RPMI-essential hits from genome-wide K562 screens.

(E) Conditional phenotypes for *AARS*. Data for secondary K562 screens are from pooled replicates in panels E-F.

(F) Gene score quantiles for *AARS* from secondary screens.

(G) Relative growth of *GPT2*-knockout versus control cells (mean  $\pm$  SD,  $n = 3$ ,  $**P < 0.005$ ).

(H) Comparison of *GPT1* versus *GPT2* RNA levels in non-disease human tissues from RNA-seq data in GTEx. Point corresponding to 'liver' is indicated. Dotted lines indicate TPM (transcripts per million) = 25.

(I) Fractional labeling of pyruvate (left) and alanine (right) following culture of cells in RPMI<sup>+dS</sup> containing [U-<sup>13</sup>C]-alanine (mean  $\pm$  SD,  $n = 3$ ,  $**P < 0.005$ ). M+3, incorporation of three <sup>13</sup>C.

(J) Immunoblot for expression of GPT1 in cells and from purified GPT1-3xFLAG. M.W. standards are annotated. GAPDH served as a loading control.

(K) Pseudocolor Coomassie-stained gel imaged using a LICOR Odyssey FC. 1: GPT1-3xFLAG, 2: GPT2-3xFLAG (see STAR Methods for note on observed M.W. versus those in immunoblots of the same purified proteins).

(L) Immunoblot for expression of GPT2 in cells and from purified GPT2-3xFLAG. M.W. standards are annotated. Cells transduced with cDNA were loaded in serial dilution as indicated. GAPDH served as a loading control.



# Figure S5

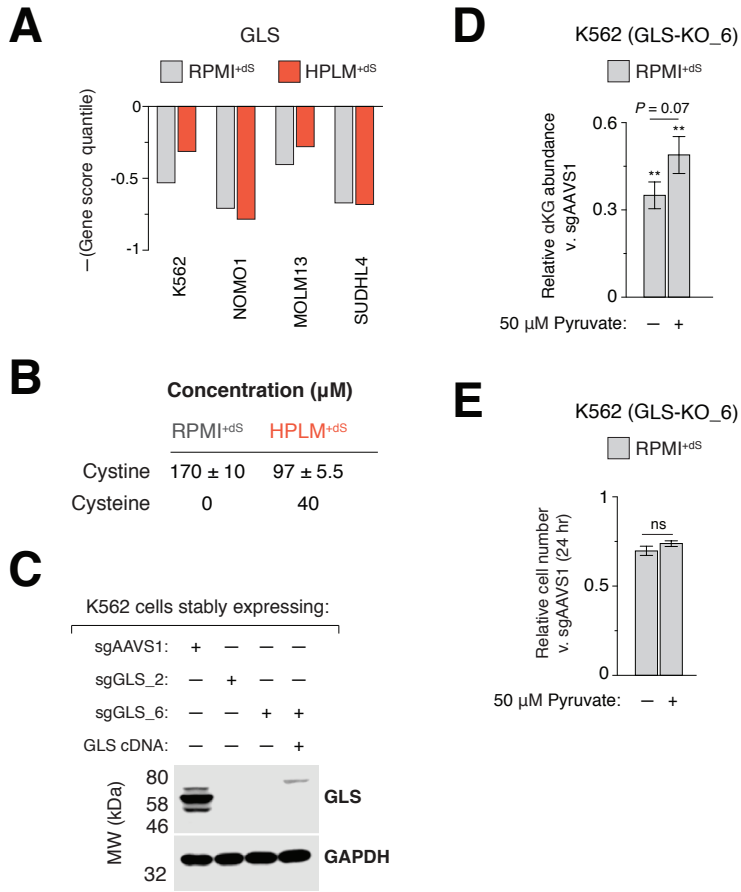

**Figure S5. Additional data related to identification of a gene-nutrient interaction between *GLS* and pyruvate, Related to Figure 5**

(A) Gene score quantiles for *GLS* from secondary screens. Data for secondary K562 screens are from pooled replicates

(B) Measured concentrations of cystine in RPMI<sup>+dS</sup> and HPLM<sup>+dS</sup> (mean  $\pm$  SD,  $n = 3$ ). Cysteine could not be detected by the metabolite profiling method but is also a defined component in HPLM.

(C) Immunoblot for expression of *GLS*. M.W. standards are annotated. GAPDH served as a loading control.

(D) Relative  $\alpha$ KG levels in *GLS*-knockout cells following 24 hr culture in either RPMI<sup>+dS</sup> or RPMI<sup>+dS</sup> containing 50  $\mu$ M pyruvate versus control cells in RPMI<sup>+dS</sup> (mean  $\pm$  SEM,  $n = 3$ ,  $**P < 0.005$ ).

(E) Relative growth of *GLS*-knockout versus control cells in the indicated conditions (mean  $\pm$  SD,  $n = 3$ ). ns, not significant.

# Figure S6

## A

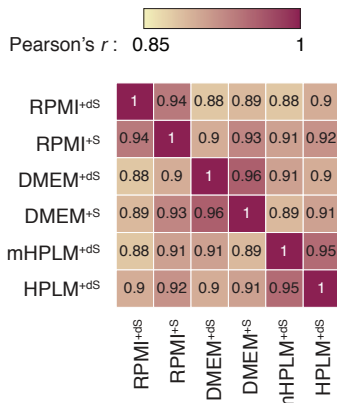

## D

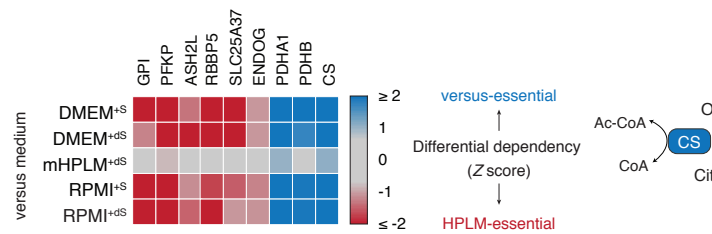

## B

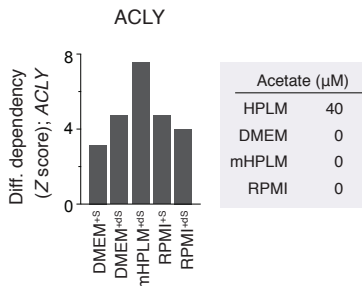

## E

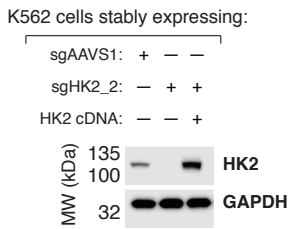

## F

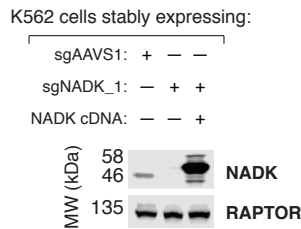

## G

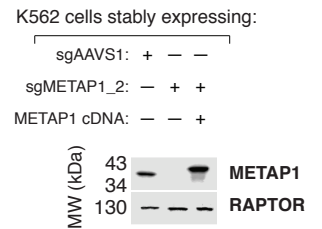

## C

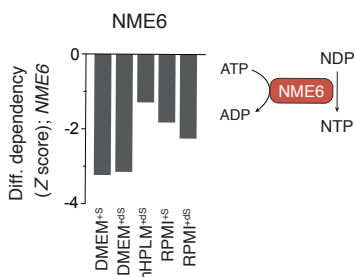

## H

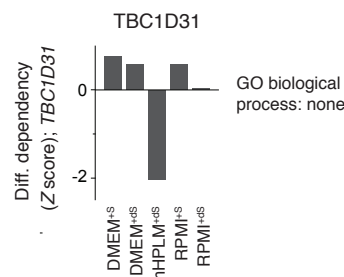

## I

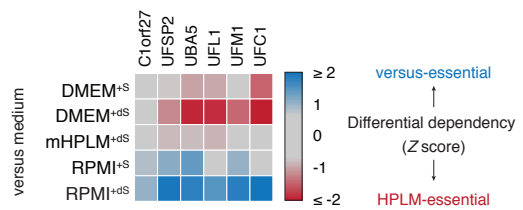

## J

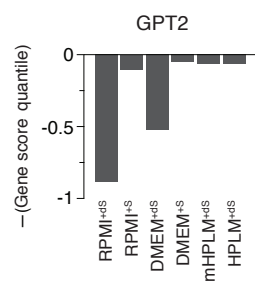

## K

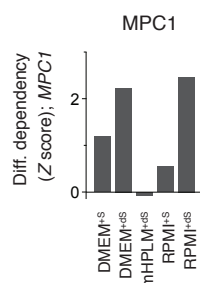

## L

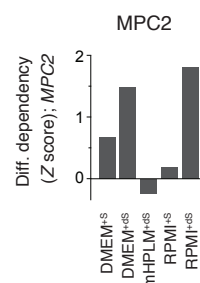

## M

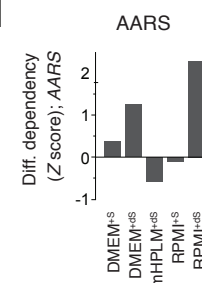

## N

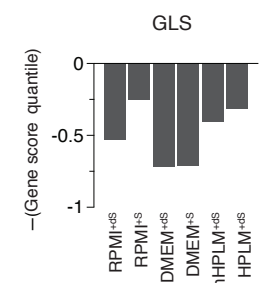

## O

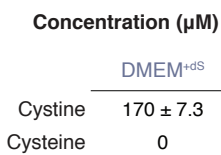

## P

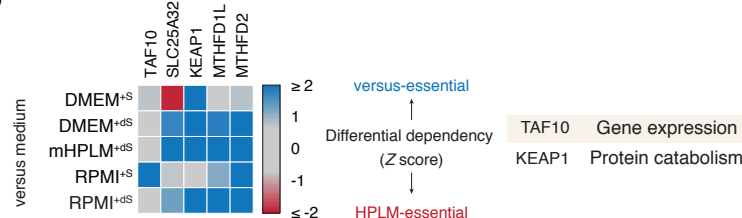

**Figure S6. Additional examples of genes with conditional phenotypes and additional data related to phenotypes for loss of *GPT2*, *MPC1/2*, *AARS*, and *GLS*, Related to Figure 6**

- (A) Gene score correlations between secondary K562 screens in six conditions. Data for screens in RPMI<sup>+dS</sup> and HPLM<sup>+dS</sup> are from pooled replicates in panels A-D; H-N; and P.
- (B-C) HPLM-relative phenotypes for *ACLY* (B) and *NME6* (C). Defined acetate levels in each basal medium (B, right). Reaction catalyzed by *NME6* (C, right).
- (D) Heatmap of HPLM-relative phenotypes for the indicated genes (left). Reaction catalyzed by CS (right). Remaining genes are highlighted in Figure 2.
- (E-G) Immunoblots for expression of HK2 (E), NADK (F), and METAP1 (G). M.W. standards are annotated. GAPDH (E) and RAPTOR (F and G) served as loading controls.
- (H) HPLM-relative phenotypes for *TBC1D31*.
- (I) Heatmap of HPLM-relative phenotypes for genes that encode components of the UFMylation machinery.
- (J) Gene score quantiles for *GPT2* from secondary screens.
- (K-M) HPLM-relative phenotypes for *MPC1* (B), *MPC2* (C), and *AARS* (D).
- (N) Gene score quantiles for *GLS* from secondary screens.
- (O) Measured concentration of cystine DMEM<sup>+dS</sup> (mean  $\pm$  SD,  $n = 3$ ). Cysteine is not a defined component in DMEM.
- (P) Heatmap of HPLM-relative phenotypes for the indicated genes (left). Manually curated processes for TAF10 and KEAP1 (right). Remaining genes are highlighted in Figure 2.
